# Supplementary material
Source: PubMed Central journal article supplement (PMC5526746)
Supplement: NIHMS834740-supplement-supplement_1.pdf [file NIHMS834740-supplement-supplement_1.pdf]

616 bacteria by class, order and family in *H. pylori*-infected children and infected adults.  
617 Analysis was performed as described in **Figure 2b. (e)** Gastric microbiota by genera in  
618 *H. pylori*-infected children and infected adults. Analysis was performed as described in  
619 **Figure 2c.** \* $P < 0.05$ , Student's *t*-test (b) or the Kruskal Wallis test (c).

620 **Figure 5.** Expression of **(a)** *FOXP3*, **(b)** *Il10*, and **(c)** *TGF $\beta$*  mRNA in the gastric  
621 tissue of *H. pylori*-infected children ( $n=11$ ), non-infected children ( $n=10$ ) and *H. pylori*-  
622 infected adults ( $n=13$ ). Expression is normalized to GAPDH mRNA. \* $P < 0.05$  \*\* $P < 0.01$ ,  
623 one-way analysis of variance (ANOVA) with Tukey's post-hoc test.

624 **Figure S1.** The gastric microbiota of non-infected children is similar to that of  
625 non-infected adults. **(a)** Frequencies of gastric bacteria by class, order and family in  
626 non-infected children and non-infected adults. The indicated class, order or family of  
627 bacteria was included when its 16S rDNA sequences were at least 1% of the total  
628 bacterial DNA content in at least one of the four groups of subjects (children and adults  
629 with and without *H. pylori* infection) and when the frequency was significantly different  
630 between any two groups. Stacked bar graphs show the average frequency for each  
631 indicated subject group. *P* values were determined using the Kruskal Wallis test with  
632 multiple comparison correction by applying false discovery rate (FDR) analysis. **(b)**  
633 Gastric microbiota by genera in non-infected children and non-infected adults. The top  
634 25 most abundant genera in the cohort of 86 *H. pylori*-infected and non-infected children  
635 and adults are listed from most to least abundant. The ranking of genera was based on  
636 the average abundance of a given genus for the four groups of subjects. Numbers  
637 correspond to *P* values, and the direction of the arrow indicates an increase or decrease  
638 in the frequency of a given genus in the non-infected children relative to the non-

639 infected adults. When a genus could not be assigned, the family is listed. Color  
640 scheme shows red on the left representing the lowest  $P$  value and green on the right  
641 representing the highest  $P$  value.  $P$  values were determined using the Kruskal Wallis  
642 test with multiple comparison correction by applying false discovery rate (FDR) analysis.

643 **Figure S2.** *H. pylori*-negative children harbor a higher frequency of phylum  
644 *Actinobacteria* than *H. pylori*-positive children. Box-and-whisker plot displays the  
645 median, maximum and minimum values for the indicated group.  $*P<0.05$ , Kruskal  
646 Wallis test.

647 **Figure S3.** Richness and abundance distribution of the gastric microbiota in  
648 children and adults without *H. pylori* infection. Alpha diversity was determined using the  
649 Simpson index, and horizontal lines indicate mean  $\pm$ SD. ns, not significant;  $*P<0.05$ ,  
650 Student's  $t$ -test.

651

Figure S1

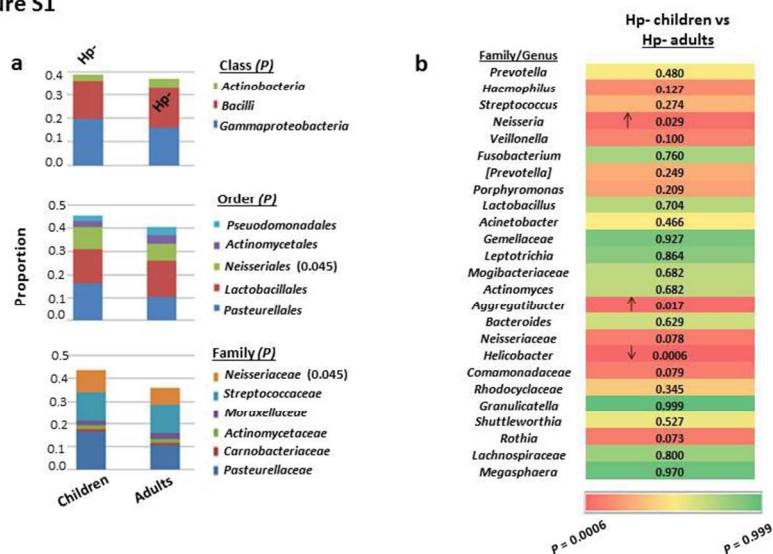

The gastric microbiota of non-infected children is similar to that of non-infected adults. (a) Frequencies of gastric bacteria by class, order and family in non-infected children and non-infected adults. The indicated class, order or family of bacteria was included when its 16S rDNA sequences were at least 1% of the total bacterial DNA content in at least one of the four groups of subjects (children and adults with and without *H. pylori* infection) and when the frequency was significantly different between any two groups. Stacked bar graphs show the average frequency for each indicated subject group. *P* values were determined using the Kruskal Wallis test with multiple comparison correction by applying false discovery rate (FDR) analysis. (b) Gastric microbiota by genera in non-infected children and non-infected adults. The top 25 most abundant genera in the cohort of 86 *H. pylori*-infected and non-infected children and adults are listed from most to least abundant. The ranking of genera was based on the average abundance of a given genus for the four groups of subjects. Numbers correspond to *P* values, and the direction of the arrow indicates an increase or decrease in the frequency of a given genus in the non-infected children relative to the non-infected adults. When a genus could not be assigned, the family is listed. Color scheme shows red on the left representing the lowest *P* value and green on the right representing the highest *P* value. *P* values were determined using the Kruskal Wallis test with multiple comparison correction by applying false discovery rate (FDR) analysis.

254x190mm (96 x 96 DPI)

Figure S2.

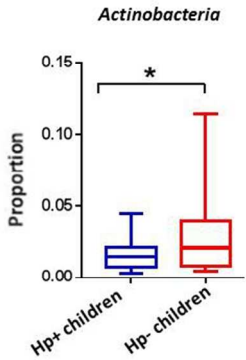

*H. pylori*-negative children harbor a higher frequency of phylum *Actinobacteria* than *H. pylori*-positive children. Box-and-whisker plot displays the median, maximum and minimum values for the indicated group. \* $P < 0.05$ , Krushal Wallis test.

254x190mm (96 x 96 DPI)

Figure S3

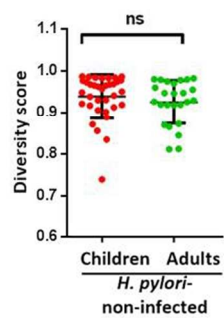

Richness and abundance distribution of the gastric microbiota in children and adults without *H. pylori* infection. Alpha diversity was determined using the Simpson index, and horizontal lines indicate mean  $\pm$ SD. ns, not significant; \* $P < 0.05$ , Student's *t*-test.

254x190mm (96 x 96 DPI)

**Table S1. Five most abundant phyla in each cohort group**

| Cohort Group | Phylum                                   |                   |                      |                     |                       |       |
|--------------|------------------------------------------|-------------------|----------------------|---------------------|-----------------------|-------|
|              | <i>Proteobacteria (non-Helicobacter)</i> | <i>Firmicutes</i> | <i>Bacteroidetes</i> | <i>Fusobacteria</i> | <i>Actinobacteria</i> | Other |
| Hp+ children | 0.43                                     | 0.22              | 0.23                 | 0.08                | 0.02                  | 0.02  |
| Hp+ adults   | 0.28                                     | 0.38              | 0.23                 | 0.07                | 0.03                  | 0.01  |
| Hp- children | 0.34                                     | 0.29              | 0.24                 | 0.08                | 0.03                  | 0.02  |
| Hp- adults   | 0.32                                     | 0.3               | 0.26                 | 0.07                | 0.04                  | 0.01  |

Numbers indicate the mean proportion of a given phylum among all the subjects in the stated cohort group.

254x190mm (96 x 96 DPI)

**Table S2. Phyla that comprise the remaining 1.1% in Figure 1a.**

| Phylum                         | Average Frequency |
|--------------------------------|-------------------|
| k_Bacteria; p_SR1              | 0.002309351       |
| k_Bacteria; p_Spirochaetes     | 0.001823255       |
| k_Bacteria; p_Cyanobacteria    | 0.00124687        |
| k_Bacteria; p_Verrucomicrobia  | 0.002209595       |
| No blast hit;Other             | 0.001324547       |
| k_Bacteria; p_TM7              | 0.000755521       |
| k_Bacteria; p_Tenericutes      | 0.000620631       |
| k_Bacteria; p_Acidobacteria    | 0.000199578       |
| k_Bacteria; p_Synergistetes    | 0.000136527       |
| k_Bacteria; p_Deferribacteres  | 9.23913E-05       |
| k_Bacteria; p_[Thermi]         | 0.00014349        |
| k_Bacteria; p_GN02             | 4.85554E-05       |
| k_Bacteria; p_Chloroflexi      | 8.21652E-05       |
| k_Bacteria; p_Gemmatimonadetes | 3.01495E-05       |
| k_Bacteria; p_WPS-2            | 6.64156E-06       |
| k_Bacteria; p_Planctomycetes   | 8.36299E-06       |
| k_Bacteria; p_SAR406           | 1.70217E-06       |
| k_Bacteria; p_Armatimonadetes  | 4.86483E-06       |
| k_Bacteria; p_OD1              | 6.18398E-07       |
| k_Archaea; p_Euryarchaeota     | 8.89469E-07       |
| k_Bacteria; p_Nitrospirae      | 1.88784E-06       |
| k_Archaea; p_Crenarchaeota     | 1.51988E-06       |
| k_Bacteria; p_TM6              | 4.37782E-06       |

254x190mm (96 x 96 DPI)
